# Supplementary material for: La aparamenta eléctrica en BT según la norma IEC 60947-2
Source: Royal Society of Chemistry journal article supplement (doi:10.1039/c4tb01310g), 2006-01-01
Supplement: c4tb01310g1.pdf [file c4tb01310g1.pdf]

## SUPPORTING INFORMATION

*for*

### **Aptamer-mediated nanocomposites of semiconductor quantum dots and graphene oxide as well as their applications in intracellular imaging and targeted drug delivery**

Li Zhang,<sup>ab</sup> Sai Jin Xiao,<sup>ac</sup> Lin Ling Zheng,<sup>a</sup> Yuan Fang Li<sup>a</sup> and Cheng Zhi Huang<sup>\*a</sup>

*<sup>a</sup>Key Laboratory of Luminescent and Real-Time Analytical Chemistry, Ministry of Education, College of Pharmaceutical Sciences, and College of Chemistry and Chemical Engineering, Southwest University, Chongqing, 400715, China. Tel: 86-23-68254659; E-mail: chengzhi@swu.edu.cn*

*<sup>b</sup>Department of Chemistry, Nanchang University, Nanchang, 330031, China.*

*<sup>c</sup>Jiangxi Key Laboratory of Mass Spectrometry and Instrumentation, East China Institute of Technology, Nanchang, 330013, China.*

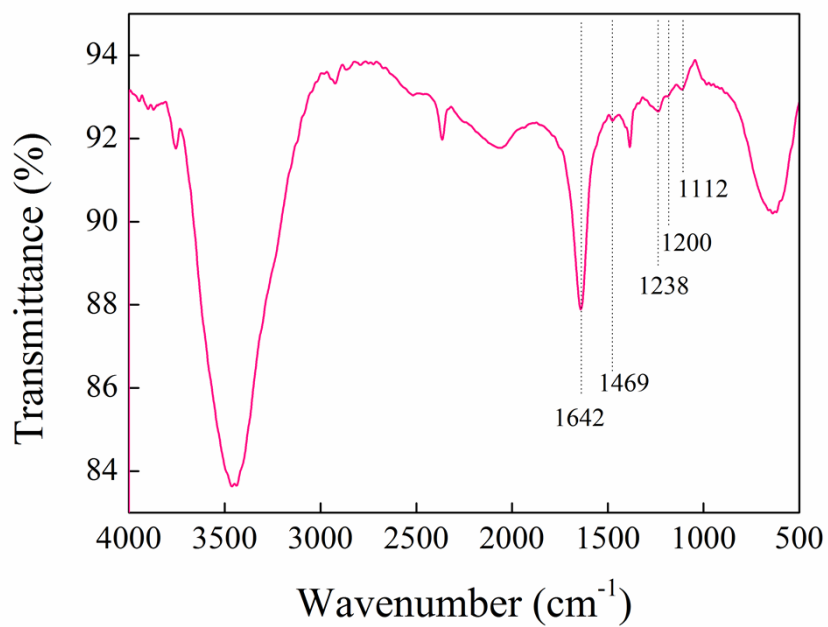

**Fig. S1** FTIR spectrum of the aptamer-QDs conjugates.

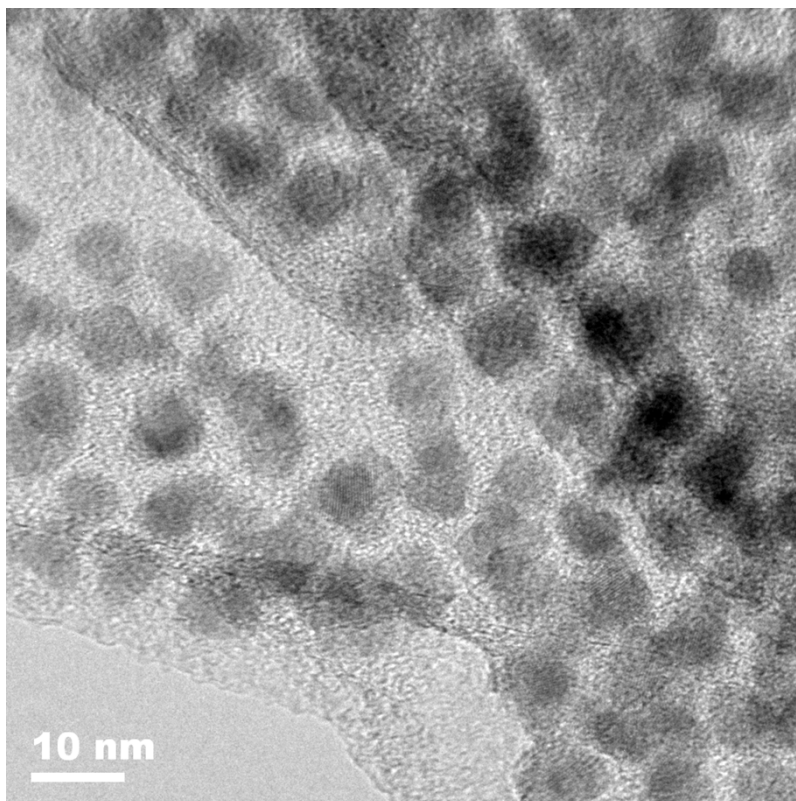

**Fig. S2** TEM image of aptamer-QDs-GO nanocomposite with high magnification

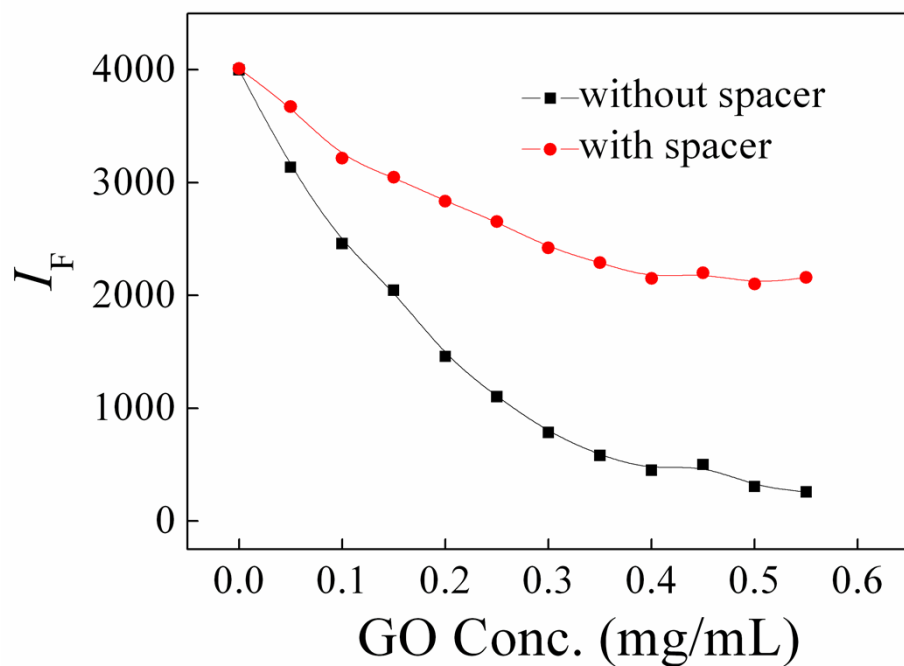

**Fig. S3** The plot of fluorescence intensity of aptamer-QDs with spacer (●) or without spacer (■) vs GO concentration.

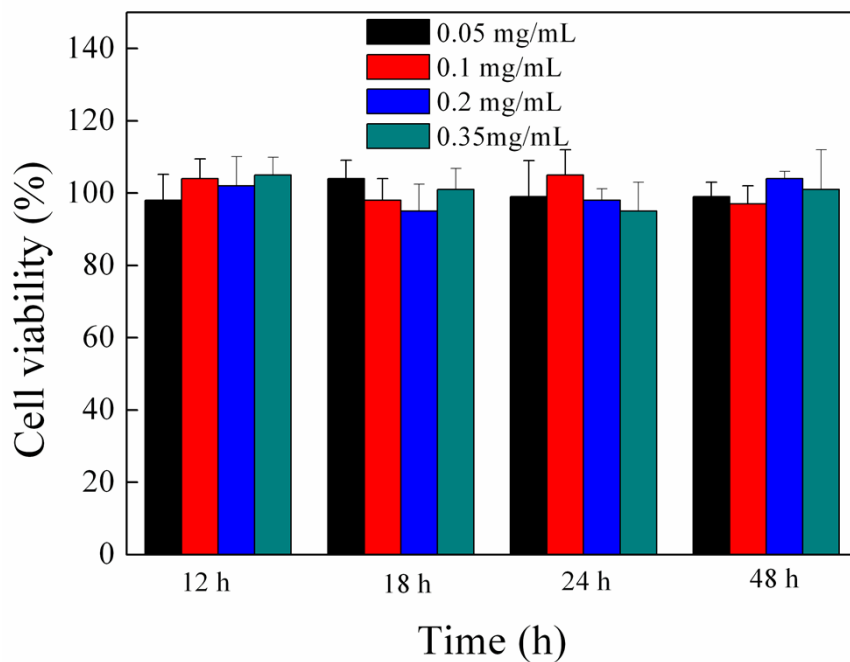

**Fig. S4** Cell viability of SK-N-SH cells after 12 to 48 hours of incubation with various amounts of aptamer-QDs-GO nanocomposites. Cell viability was measured using a MTT assay.
